# Supplementary material for: Long-Chain Polyunsaturated Fatty Acids Are Associated with Blood Pressure and Hypertension over 10-Years in Black South African Adults Undergoing Nutritional Transition
Source: PubMed Central journal article supplement (PMC6770669; doi:10.3390/foods8090394), 2019-09-06
Supplement: foods-08-00394-s001.pdf [file foods-08-00394-s001.pdf]

*Supplementary Tables*

**Supplementary Table S1.** Blood pressure across 10 years in black South Africans.

|                                       | 2005           | 2010           | 2015           | <i>p</i> <sup>1</sup> |
|---------------------------------------|----------------|----------------|----------------|-----------------------|
| <b>Systolic blood pressure, mmHg</b>  |                |                |                |                       |
| Complete sample, <i>n</i>             | 136.54 (23.29) | 137.52 (24.87) | 135.74 (25.56) | 0.678                 |
| Rural areas, <i>n</i> 140             | 131.56 (22.81) | 136.57 (26.92) | 137.57 (27.12) | 0.113                 |
| Urban areas, <i>n</i> 160             | 140.91 (22.89) | 138.34 (23.02) | 134.13 (24.07) | 0.034                 |
| <b>Diastolic blood pressure, mmHg</b> |                |                |                |                       |
| Complete sample, <i>n</i>             | 89.04 (12.69)  | 88.55 (13.35)  | 85.37 (13.31)  | 0.001                 |
| Rural areas, <i>n</i> 140             | 87.10 (13.33)  | 87.92 (13.66)  | 87.31 (14.19)  | 0.877                 |
| Urban areas, <i>n</i> 160             | 90.75 (11.87)  | 89.09 (13.09)  | 83.66 (12.27)  | <0.0001               |

Data presented as mean (SD). <sup>1</sup>Probability trends associated with differences across three study years calculated by general linear model.

**Supplementary Table S2.** Plasma phospholipids fatty acid status across 10-years in rural (n 140) and urban (n 160) black South Africans.

|                                   | 2005              |                   | 2010              |                   | 2015              |                   | <i>p</i> <sup>1</sup> | <i>p</i> <sup>2</sup> |
|-----------------------------------|-------------------|-------------------|-------------------|-------------------|-------------------|-------------------|-----------------------|-----------------------|
|                                   | Rural areas       | Urban areas       | Rural areas       | Urban areas       | Rural areas       | Urban areas       |                       |                       |
| <b>Myristic acid, 14:0</b>        | 0.26 (0.00)       | 0.28 (0.00)       | 0.26 (0.00)       | 0.28 (0.00)       | 0.30 (0.01)       | 0.36 (0.01)       | <0.0001               | <0.0001               |
| <b>Palmitic acid, 16:0</b>        | 26.62 (0.08)      | 27.21 (0.09)      | 27.63 (0.13)      | 26.77 (0.15)      | 25.47 (0.05)      | 24.20 (0.05)      | 0.002                 | <0.0001               |
| <b>Palmitoleic acid, 16:1 n-7</b> | 0.75 [0.71, 0.79] | 0.96 [0.91, 1.00] | 0.70 [0.67, 0.73] | 0.91 [0.87, 0.94] | 0.78 [0.74, 0.82] | 1.03 [0.98, 1.08] | 0.407                 | 0.158                 |
| <b>Stearic acid, 18:0</b>         | 16.23 (0.30)      | 14.41 (0.34)      | 15.55 (0.15)      | 14.38 (0.17)      | 14.16 (0.06)      | 14.22 (0.07)      | <0.0001               | 0.147                 |
| <b>Oleic acid, 18:1 n-9</b>       | 8.33 [8.17, 8.48] | 9.26 [9.04, 9.43] | 7.86 [7.69, 8.02] | 8.93 [8.70, 9.12] | 7.72 [7.61, 7.82] | 8.62 [8.47, 8.74] | 0.056                 | 0.136                 |
| <b>Mead, 20:3 n-9</b>             | 0.25 [0.24, 0.25] | 0.26 [0.25, 0.26] | 0.25 [0.24, 0.26] | 0.22 [0.22, 0.23] | 0.19 [0.19, 0.20] | 0.28 [0.27, 0.29] | 0.001                 | 0.451                 |
| <b>Linoleic acid, 18:2 n-6</b>    | 15.75 (0.30)      | 16.27 (0.34)      | 15.65 (0.21)      | 17.62 (0.23)      | 16.29 (0.17)      | 15.88 (0.20)      | 0.094                 | 0.377                 |
| <b>γ-Linolenic, 18:3 n-6</b>      | 0.11 [0.11, 0.12] | 0.12 [0.12, 0.13] | 0.11 [0.11, 0.11] | 0.13 [0.12, 0.13] | 0.10 [0.09, 0.10] | 0.11 [0.11, 0.12] | 0.065                 | 0.162                 |
| <b>Dihomo-γ-linolenic, 20:3</b>   | 2.96 (0.08)       | 2.87 (0.09)       | 2.87 (0.07)       | 2.91 (0.08)       | 3.29 (0.04)       | 3.65 (0.04)       | <0.0001               | <0.0001               |
| <b>Arachidonic acid, 20:4 n-6</b> | 13.83 (0.00)      | 13.35 (0.00)      | 14.98 (0.02)      | 14.37 (0.03)      | 18.48 (0.16)      | 17.82 (0.18)      | <0.0001               | <0.0001               |
| <b>Adrenic, 22:4 n-6</b>          | 0.67 (0.00)       | 0.54 (0.00)       | 0.69 (0.00)       | 0.71 (0.00)       | 0.64 (0.01)       | 0.68 (0.01)       | 0.441                 | <0.0001               |
| <b>Osbond, 22:5 n-6</b>           | 0.67 [0.67, 0.68] | 0.56 [0.56, 0.57] | 0.69 [0.69, 0.70] | 0.73 [0.73, 0.74] | 0.93 [0.92, 0.94] | 1.09 [1.08, 1.10] | <0.0001               | <0.0001               |
| <b>α-linolenic acid, 18:3 n-3</b> | 0.09 [0.09, 0.09] | 0.09 [0.09, 0.10] | 0.11 [0.11, 0.11] | 0.09 [0.09, 0.09] | 0.08 [0.07, 0.08] | 0.07 [0.07, 0.08] | 0.024                 | <0.0001               |
| <b>EPA, 20:5 n-3</b>              | 0.59 [0.58, 0.60] | 0.80 [0.79, 0.81] | 0.60 [0.59, 0.61] | 0.45 [0.44, 0.46] | 0.52 [0.50, 0.55] | 0.59 [0.55, 0.62] | 0.070                 | <0.0001               |
| <b>Docosapentaenoic, 22:5 n-3</b> | 1.39 (0.00)       | 1.43 (0.00)       | 1.62 (0.03)       | 1.24 (0.04)       | 1.61 (0.01)       | 1.46 (0.02)       | <0.0001               | 0.366                 |
| <b>DHA, 22:6 n-3</b>              | 3.91 (0.06)       | 5.13 (0.07)       | 3.99 (0.04)       | 3.79 (0.04)       | 4.30 (0.13)       | 4.36 (0.15)       | 0.004                 | <0.0001               |

EPA, Eicosapentaenoic acid; DHA, Docosahexaenoic acid. Age-adjusted data presented as mean (SD) or median [25th, 75th]. <sup>1</sup>Probability trends associated with differences across three study years within rural subjects, calculated by general linear model adjusted for age. <sup>2</sup>Probability trends associated with differences across three study years within urban subjects, calculated by general linear model adjusted for age.

**Supplementary Table S3.** Baseline correlations between dietary intake of n-3 fatty acids and long-chain fatty acids in plasma phospholipids in 300 black South Africans: Pearson correlation matrix.

|                      | DGLA             | AA               | Adrenic           | Osbond            | EPA               | DPA_n3           | DHA               | Intake_EPADHA    | Intake_Omega 3    |
|----------------------|------------------|------------------|-------------------|-------------------|-------------------|------------------|-------------------|------------------|-------------------|
| <b>DGLA</b>          | 1                | 0.303<br><0.0001 | 0.413<br><0.0001  | 0.395<br><0.0001  | 0.012<br>0.833    | 0.208<br><0.0001 | 0.119<br>0.040    | -0.091<br>0.117  | -0.073<br>0.210   |
| <b>AA</b>            | 0.303<br><0.0001 | 1                | 0.428<br><0.0001  | 0.444<br><0.0001  | 0.017<br>0.771    | 0.367<br><0.0001 | 0.392<br><0.0001  | -0.136<br>0.018  | -0.113<br>0.052   |
| <b>Adrenic</b>       | 0.413<br><0.0001 | 0.428<br><0.0001 | 1                 | 0.725<br><0.0001  | -0.229<br><0.0001 | 0.221<br><0.0001 | -0.243<br><0.0001 | -0.126<br>0.030  | -0.280<br><0.0001 |
| <b>Osbond</b>        | 0.395<br><0.0001 | 0.444<br><0.0001 | 0.725<br><0.0001  | 1                 | -0.284<br><0.0001 | -0.044<br>0.444  | -0.054<br>0.355   | -0.180<br>0.002  | -0.198<br>0.001   |
| <b>EPA</b>           | 0.012<br>0.833   | 0.017<br>0.771   | -0.229<br><0.0001 | -0.284<br><0.0001 | 1                 | 0.454<br><0.0001 | 0.271<br><0.0001  | 0.096<br>0.095   | 0.138<br>0.017    |
| <b>DPA_n3</b>        | 0.208<br><0.0001 | 0.367<br><0.0001 | 0.221<br><0.0001  | -0.044<br>0.444   | 0.454<br><0.0001  | 1                | 0.352<br><0.0001  | 0.019<br>0.741   | 0.038<br>0.509    |
| <b>DHA</b>           | 0.119<br>0.040   | 0.392<br><0.0001 | -0.243<br><0.0001 | -0.054<br>0.355   | 0.271<br><0.0001  | 0.352<br><0.0001 | 1                 | 0.023<br>0.689   | 0.218<br><0.0001  |
| <b>Intake_EPADHA</b> | -0.091<br>0.117  | -0.136<br>0.018  | -0.126<br>0.030   | -0.180<br>0.002   | 0.096<br>0.095    | 0.019<br>0.741   | 0.023<br>0.689    | 1                | 0.769<br><0.0001  |
| <b>Intake_Omega3</b> | -0.073<br>0.210  | -0.113<br>0.052  | -0.280<br><0.0001 | -0.198<br>0.001   | 0.138<br>0.017    | 0.038<br>0.509   | 0.218<br><0.0001  | 0.769<br><0.0001 | 1                 |

DGLA, dihommo- $\gamma$ -linoleic acid; AA, arachidonic acid; EPA, Eicosapentaenoic acid; DPA\_n3, docosapentaenoic acid; DHA, Docosahexaenoic acid; Intake\_EPADHA, Cumulative intake of preformed EPA and DHA; Intake\_Omega3, Cumulative intake of EPA, DHA and plant-originated essential  $\alpha$ -linolenic acid.

**Supplementary Table S4.** Ten-year associations between plasma phospholipid long-chain fatty acids and blood pressure in rural and urban black South Africans.

|                                                            |  | Systolic blood pressure        |                       |                                |                       | Diastolic blood pressure       |                       |                                |                       |
|------------------------------------------------------------|--|--------------------------------|-----------------------|--------------------------------|-----------------------|--------------------------------|-----------------------|--------------------------------|-----------------------|
|                                                            |  | Rural subjects ( <i>n</i> 140) |                       | Urban subjects ( <i>n</i> 160) |                       | Rural subjects ( <i>n</i> 140) |                       | Urban subjects ( <i>n</i> 160) |                       |
|                                                            |  | $\beta$ (95% CI)               | <i>p</i> <sup>3</sup> | $\beta$ (95% CI)               | <i>p</i> <sup>3</sup> | $\beta$ (95% CI)               | <i>p</i> <sup>3</sup> | $\beta$ (95% CI)               | <i>p</i> <sup>3</sup> |
| <b>Long-chain n-3 fatty acids</b>                          |  |                                |                       |                                |                       |                                |                       |                                |                       |
| <b>EPA, 20:5 n-3</b>                                       |  |                                |                       |                                |                       |                                |                       |                                |                       |
| T1                                                         |  | ref.                           |                       | ref.                           |                       | ref.                           |                       | ref.                           |                       |
| T2 <sup>1</sup>                                            |  | 1.09 (-3.82, 5.99)             | 0.867                 | 1.69 (-2.71, 6.10)             | 0.247                 | 1.64 (-1.19, 4.47)             | 0.504                 | 1.15 (-1.36, 3.67)             | 0.276                 |
| T3                                                         |  | -0.07 (-5.08, 4.93)            |                       | 3.75 (-0.65, 8.15)             |                       | 1.24 (-1.65, 4.12)             |                       | 2.05 (-0.46, 4.56)             |                       |
| T2 <sup>2</sup>                                            |  | 1.31 (-3.68, 6.30)             | 0.717                 | 2.65 (-1.84, 7.14)             | 0.120                 | 1.44 (-1.48, 4.36)             | 0.624                 | 1.48 (-1.10, 4.07)             | 0.188                 |
| T3                                                         |  | -0.63 (-5.72, 4.46)            |                       | 4.65 (0.21, 9.09)              |                       | 0.79 (-2.18, 3.77)             |                       | 2.36 (-0.20, 4.91)             |                       |
| <b>Docosapentaenoic, 22:5 n-3</b>                          |  |                                |                       |                                |                       |                                |                       |                                |                       |
| T1                                                         |  | ref.                           |                       | ref.                           |                       | ref.                           |                       | ref.                           |                       |
| T2 <sup>1</sup>                                            |  | 0.58 (-4.43, 5.59)             | 0.898                 | 0.31 (-4.20, 4.82)             | 0.971                 | 1.21 (-1.68, 4.09)             | 0.305                 | 0.31 (-2.26, 2.87)             | 0.680                 |
| T3                                                         |  | -0.57 (-5.78, 4.63)            |                       | 0.58 (-4.12, 5.28)             |                       | -1.01 (-4.01, 1.98)            |                       | -0.81 (-3.47, 1.86)            |                       |
| T2 <sup>2</sup>                                            |  | -0.73 (-5.72, 4.27)            | 0.957                 | -1.44 (-5.97, 3.09)            | 0.780                 | 0.36 (-2.55, 3.28)             | 0.566                 | -0.46 (-3.05, 2.14)            | 0.738                 |
| T3                                                         |  | -0.58 (-5.84, 4.68)            |                       | -0.09 (-4.81, 4.62)            |                       | -1.19 (-4.25, 1.87)            |                       | -1.07 (-3.76, 1.63)            |                       |
| <b>DHA, 22:6 n-3</b>                                       |  |                                |                       |                                |                       |                                |                       |                                |                       |
| T1                                                         |  | ref.                           |                       | ref.                           |                       | ref.                           |                       | ref.                           |                       |
| T2 <sup>1</sup>                                            |  | -1.37 (-6.35, 3.61)            | 0.174                 | -0.75 (-5.34, 3.83)            | 0.943                 | -1.68 (-4.56, 1.19)            | 0.132                 | -1.31 (-3.92, 1.30)            | 0.588                 |
| T3                                                         |  | -4.91 (-10.28, 0.47)           |                       | -0.66 (-5.44, 4.12)            |                       | -3.18 (-6.27, -0.08)           |                       | -1.10 (-3.81, 1.62)            |                       |
| T2 <sup>2</sup>                                            |  | -2.14 (-7.14, 2.86)            | 0.207                 | -0.45 (-5.06, 4.16)            | 0.982                 | -2.33 (-5.25, 0.58)            | 0.049                 | -1.07 (-3.71, 1.57)            | 0.719                 |
| T3                                                         |  | -4.87 (-10.27, 0.54)           |                       | -0.26 (-5.16, 4.64)            |                       | -3.91 (-7.04, -0.78)           |                       | -0.42 (-3.22, 2.38)            |                       |
| <b>Long-chain n-6 fatty acids</b>                          |  |                                |                       |                                |                       |                                |                       |                                |                       |
| <b>Dihomo-<math>\gamma</math>-linolenic acid, 20:3 n-6</b> |  |                                |                       |                                |                       |                                |                       |                                |                       |
| T1                                                         |  | ref.                           |                       | ref.                           |                       | ref.                           |                       | ref.                           |                       |
| T2 <sup>1</sup>                                            |  | 4.09 (-0.90, 9.07)             | 0.253                 | -0.57 (-5.02, 3.88)            | 0.179                 | 1.13 (-1.75, 4.00)             | 0.331                 | -0.23 (-2.75, 2.29)            | 0.012                 |
| T3                                                         |  | 3.09 (-1.93, 8.12)             |                       | -3.99 (-8.60, 0.61)            |                       | 2.20 (-0.71, 5.10)             |                       | -3.51 (-6.11, -0.91)           |                       |

|                                   |                     |       |                       |       |                     |       |                      |         |
|-----------------------------------|---------------------|-------|-----------------------|-------|---------------------|-------|----------------------|---------|
| T2 <sup>2</sup>                   | 1.89 (-3.14, 6.92)  |       | -0.57 (-5.10, 3.96)   |       | 0.06 (-2.88, 2.99)  |       | 0.05 (-2.53, 2.64)   |         |
| T3                                | 0.94 (-4.10, 5.98)  | 0.760 | -4.19 (-8.99, 0.62)   | 0.173 | 0.81 (-2.13, 3.75)  | 0.824 | -3.29 (-6.03, -0.55) | 0.020   |
| <b>Arachidonic acid, 20:4 n-6</b> |                     |       |                       |       |                     |       |                      |         |
| T1                                | ref.                |       | ref.                  |       | ref.                |       | ref.                 |         |
| T2 <sup>1</sup>                   | 3.80 (-0.91, 8.52)  |       | -2.49 (-6.83, 1.85)   |       | 1.60 (-1.14, 4.33)  |       | -2.20 (-4.60, 0.21)  |         |
| T3                                | 2.61 (-2.16, 7.38)  | 0.273 | -8.16 (-12.46, -3.86) | 0.001 | 0.22 (-2.55, 2.98)  | 0.456 | -7.01 (-9.39, -4.62) | <0.0001 |
| T2 <sup>2</sup>                   | 3.32 (-1.42, 8.07)  |       | -2.43 (-6.79, 1.93)   |       | 1.79 (-1.00, 4.58)  |       | -2.16 (-4.59, 0.28)  |         |
| T3                                | 1.38 (-3.41, 6.16)  | 0.383 | -7.57 (-11.97, -3.18) | 0.003 | -0.21 (-3.02, 2.60) | 0.298 | -6.74 (-9.20, -4.29) | <0.0001 |
| <b>Adrenic acid, 22:4 n-6</b>     |                     |       |                       |       |                     |       |                      |         |
| T1                                | ref.                |       | ref.                  |       | ref.                |       | ref.                 |         |
| T2 <sup>1</sup>                   | -1.07 (-5.98, 3.83) |       | -2.61 (-6.99, 1.76)   |       | 1.20 (-1.63, 4.03)  |       | -0.79 (-3.28, 1.70)  |         |
| T3                                | 3.33 (-1.93, 8.59)  | 0.194 | -0.64 (-5.28, 3.99)   | 0.467 | 2.76 (-0.27, 5.78)  | 0.200 | -1.65 (-4.28, 0.98)  | 0.470   |
| T2 <sup>2</sup>                   | -2.02 (-6.98, 2.94) |       | -3.00 (-7.34, 1.35)   |       | 0.63 (-2.26, 3.53)  |       | -0.62 (-3.11, 1.87)  |         |
| T3                                | 1.94 (-3.43, 7.32)  | 0.281 | -1.07 (-5.79, 3.65)   | 0.383 | 2.52 (-0.60, 5.63)  | 0.247 | -1.51 (-4.20, 1.19)  | 0.547   |
| <b>Osbond acid, 22:5 n-6</b>      |                     |       |                       |       |                     |       |                      |         |
| T1                                | ref.                |       | ref.                  |       | ref.                |       | ref.                 |         |
| T2 <sup>1</sup>                   | -1.51 (-6.27, 3.24) |       | -2.85 (-7.16, 1.47)   |       | -1.31 (-4.08, 1.45) |       | -1.98 (-4.39, 0.43)  |         |
| T3                                | 3.67 (-1.67, 9.00)  | 0.126 | -5.37 (-9.94, -0.79)  | 0.071 | 0.35 (-2.72, 3.43)  | 0.463 | -5.56 (-8.11, -3.00) | <0.0001 |
| T2 <sup>2</sup>                   | -1.34 (-6.16, 3.49) |       | -3.54 (-7.84, 0.75)   |       | -0.92 (-3.75, 1.91) |       | -2.28 (-4.71, 0.14)  |         |
| T3                                | 1.28 (-4.20, 6.76)  | 0.597 | -5.83 (-10.50, -1.17) | 0.046 | -0.17 (-3.34, 3.01) | 0.788 | -5.55 (-8.17, -2.92) | <0.0001 |

EPA, Eicosapentaenoic acid; DHA, Docosahexaenoic acid; T1, T2, T3, Increasing tertiles of plasma phospholipid fatty acid content.

<sup>1</sup>Model 1 adjusted for age and gender. <sup>2</sup>Model 2 further adjusted for level of education, use of tobacco, use of hypertension medication, body mass index, physical activity index and dietary intake of alcohol (g). <sup>3</sup>Probability values associated with  $\beta$  estimating absolute change in blood pressure (in mmHg) with regards to 10-year change in a fatty acid level.

**Supplementary Table S5.** Ten-year associations between plasma phospholipid long-chain fatty acids and hypertension status in black South Africans.

|                                                            | General ( <i>n</i> 300) |                       | Rural subjects ( <i>n</i> 140) |                       | Urban subjects ( <i>n</i> 160) |                       |
|------------------------------------------------------------|-------------------------|-----------------------|--------------------------------|-----------------------|--------------------------------|-----------------------|
|                                                            | OR (95% CI)             | <i>p</i> <sup>3</sup> | OR (95% CI)                    | <i>p</i> <sup>3</sup> | OR (95% CI)                    | <i>p</i> <sup>3</sup> |
| <b>Long-chain n-3 fatty acids</b>                          |                         |                       |                                |                       |                                |                       |
| <b>EPA, 20:5 n-3</b>                                       |                         |                       |                                |                       |                                |                       |
| T1                                                         | ref.                    |                       | ref.                           |                       | ref.                           |                       |
| T2 <sup>1</sup>                                            | 1.43 (1.03, 1.99)       | 0.093                 | 1.39 (0.87, 2.21)              | 0.190                 | 1.27 (0.79, 2.05)              | 0.589                 |
| T3                                                         | 1.28 (0.92, 1.78)       |                       | 1.53 (0.95, 2.47)              |                       | 1.07 (0.68, 1.70)              |                       |
| T2 <sup>2</sup>                                            | 1.57 (1.10, 2.24)       | 0.028                 | 1.46 (0.86, 2.49)              | 0.134                 | 1.46 (0.88, 2.40)              | 0.341                 |
| T3                                                         | 1.46 (1.03, 2.08)       |                       | 1.72 (1.00, 2.98)              |                       | 1.19 (0.73, 1.93)              |                       |
| <b>Docosapentaenoic acid, 22:5 n-3</b>                     |                         |                       |                                |                       |                                |                       |
| T1                                                         | ref.                    |                       | ref.                           |                       | ref.                           |                       |
| T2 <sup>1</sup>                                            | 1.16 (0.83, 1.62)       | 0.594                 | 1.14 (0.71, 1.83)              | 0.300                 | 1.05 (0.65, 1.69)              | 0.714                 |
| T3                                                         | 1.00 (0.71, 1.41)       |                       | 1.47 (0.90, 2.40)              |                       | 0.87 (0.54, 1.40)              |                       |
| T2 <sup>2</sup>                                            | 1.15 (0.80, 1.64)       | 0.700                 | 1.09 (0.64, 1.85)              | 0.330                 | 1.02 (0.62, 1.68)              | 0.810                 |
| T3                                                         | 1.01 (0.70, 1.46)       |                       | 1.50 (0.86, 2.62)              |                       | 0.88 (0.53, 1.45)              |                       |
| <b>DHA, 22:6 n-3</b>                                       |                         |                       |                                |                       |                                |                       |
| T1                                                         | ref.                    |                       | ref.                           |                       | ref.                           |                       |
| T2 <sup>1</sup>                                            | 1.02 (0.73, 1.42)       | 0.840                 | 1.11 (0.69, 1.78)              | 0.436                 | 0.72 (0.45, 1.17)              | 0.370                 |
| T3                                                         | 1.10 (0.78, 1.57)       |                       | 1.38 (0.83, 2.30)              |                       | 0.92 (0.56, 1.52)              |                       |
| T2 <sup>2</sup>                                            | 1.01 (0.70, 1.44)       | 0.994                 | 0.99 (0.57, 1.70)              | 0.658                 | 0.73 (0.44, 1.20)              | 0.459                 |
| T3                                                         | 1.02 (0.70, 1.50)       |                       | 1.25 (0.70, 2.23)              |                       | 0.86 (0.51, 1.47)              |                       |
| <b>Long-chain n-6 fatty acids</b>                          |                         |                       |                                |                       |                                |                       |
| <b>Dihomo-<math>\gamma</math>-linolenic acid, 20:3 n-6</b> |                         |                       |                                |                       |                                |                       |
| T1                                                         | ref.                    |                       | ref.                           |                       | ref.                           |                       |
| T2 <sup>1</sup>                                            | 1.47 (1.06, 2.04)       | 0.038                 | 1.95 (1.22, 3.13)              | 0.001                 | 1.08 (0.67, 1.74)              | 0.587                 |
| T3                                                         | 1.44 (1.03, 2.00)       |                       | 2.43 (1.50, 3.94)              |                       | 0.85 (0.53, 1.37)              |                       |
| T2 <sup>2</sup>                                            | 1.38 (0.97, 1.97)       | 0.156                 | 1.62 (0.95, 2.79)              | 0.042                 | 1.08 (0.66, 1.78)              | 0.678                 |
| T3                                                         | 1.33 (0.93, 1.92)       |                       | 1.99 (1.15, 3.43)              |                       | 0.86 (0.51, 1.45)              |                       |
| <b>Arachidonic acid, 20:4 n-6</b>                          |                         |                       |                                |                       |                                |                       |
| T1                                                         | ref.                    |                       | ref.                           |                       | ref.                           |                       |
| T2 <sup>1</sup>                                            | 0.83 (0.60, 1.15)       | 0.536                 | 1.48 (0.94, 2.34)              | 0.049                 | 0.67 (0.41, 1.07)              | 0.150                 |
| T3                                                         | 0.91 (0.65, 1.26)       |                       | 1.75 (1.11, 2.78)              |                       | 0.66 (0.41, 1.06)              |                       |
| T2 <sup>2</sup>                                            | 0.82 (0.58, 1.17)       | 0.512                 | 1.42 (0.84, 2.40)              | 0.147                 | 0.67 (0.41, 1.10)              | 0.131                 |
| T3                                                         | 0.85 (0.60, 1.21)       |                       | 1.69 (0.99, 2.88)              |                       | 0.62 (0.37, 1.01)              |                       |
| <b>Adrenic acid, 22:4 n-6</b>                              |                         |                       |                                |                       |                                |                       |
| T1                                                         | ref.                    |                       | ref.                           |                       | ref.                           |                       |
| T2 <sup>1</sup>                                            | 1.13 (0.82, 1.57)       | 0.757                 | 1.09 (0.68, 1.75)              | 0.878                 | 1.04 (0.66, 1.65)              | 0.907                 |
| T3                                                         | 1.08 (0.77, 1.52)       |                       | 1.13 (0.69, 1.86)              |                       | 1.11 (0.69, 1.80)              |                       |
| T2 <sup>2</sup>                                            | 1.16 (0.82, 1.64)       | 0.701                 | 1.12 (0.65, 1.91)              | 0.913                 | 1.08 (0.67, 1.75)              | 0.836                 |
| T3                                                         | 1.11 (0.77, 1.61)       |                       | 1.10 (0.63, 1.94)              |                       | 1.17 (0.70, 1.95)              |                       |
| <b>Osbond acid, 22:5 n-6</b>                               |                         |                       |                                |                       |                                |                       |

| T1              | ref.              |       | ref.              |       | ref.              |       |
|-----------------|-------------------|-------|-------------------|-------|-------------------|-------|
| T2 <sup>1</sup> | 1.25 (0.91, 1.73) | 0.372 | 1.54 (0.98, 2.45) | 0.005 | 0.93 (0.58, 1.49) | 0.372 |
| T3              | 1.19 (0.85, 1.67) |       | 2.35 (1.41, 3.91) |       | 0.72 (0.45, 1.17) |       |
| T2 <sup>2</sup> | 1.23 (0.87, 1.75) | 0.481 | 1.52 (0.89, 2.59) | 0.030 | 0.95 (0.58, 1.54) | 0.458 |
| T3              | 1.16 (0.81, 1.67) |       | 2.22 (1.23, 4.02) |       | 0.74 (0.45, 1.23) |       |

EPA, Eicosapentaenoic acid; DHA, Docosahexaenoic acid; T1, T2, T3, Increasing tertiles of plasma phospholipid fatty acid content. <sup>1</sup>Model 1 adjusted for age, gender and urbanization status (the latter in the complete sample only). <sup>2</sup>Model 2 further adjusted for level of education, use of tobacco, body mass index, physical activity index and dietary intake of alcohol (g). <sup>3</sup>Probability values associated with OR of being hypertensive across the 10-years.

Supplementary Figures

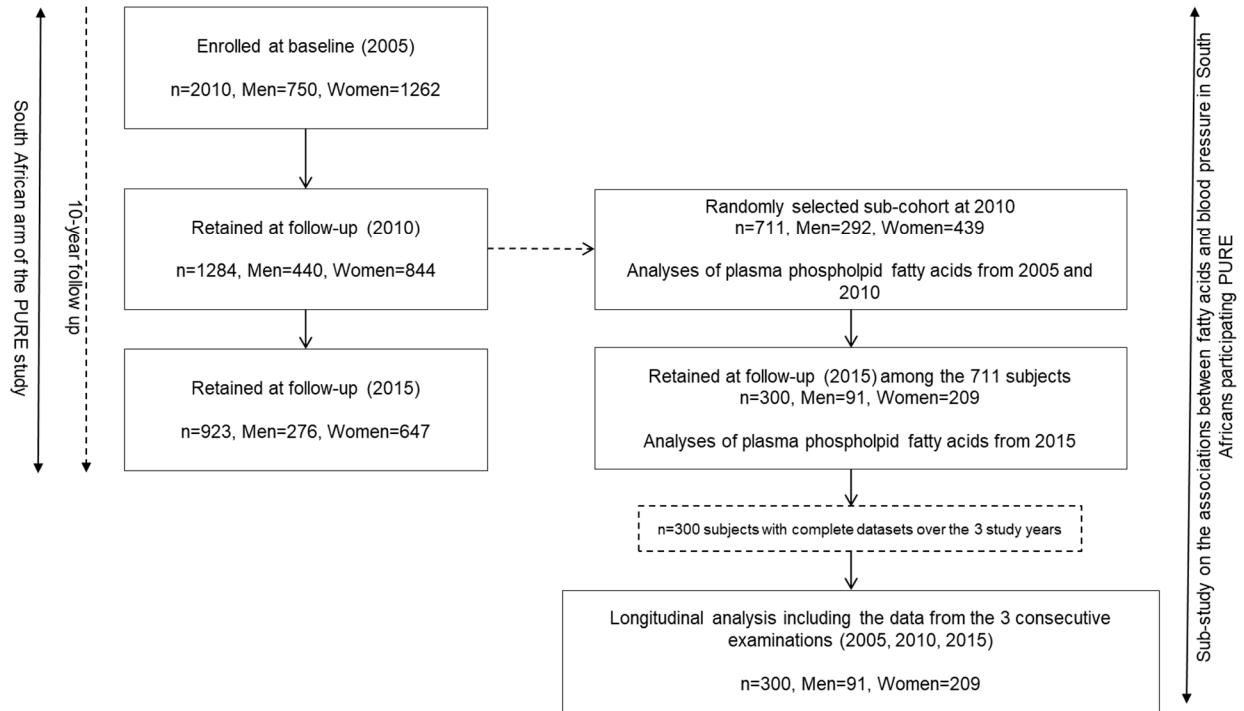

**Supplementary Figure S1.** Flow-diagram explaining selection of the 300 black South Africans for the longitudinal analysis of associations between fatty acids and blood pressure over 10 years.
